# Supplementary material for: Indigo-Mediated Semi-Microbial Biofuel Cell Using an Indigo-Dye Fermenting Suspension
Source: MDPI journal article supplement (doi:10.3390/catal11091080), 2021-09-08
Supplement: s1 [file s1]

Archive with 2 entries (2 files):
- catalysts-1322249-supplementary.pdf
- Video S1.MOV
